# Supplementary material for: White Matter Microstructural Alterations and their Association with Decision-Making Deficits in Suicide Attempters
Source: Research Square preprint supplement (doi:10.21203/rs.3.rs-8194143/v1), 2025-12-31
Supplement: Supplementary file 1 [file bfe5d614aae9e747b665e99c.docx]

**Title: “White Matter Microstructural Alterations Associated with Decision-Making Deficits in Suicide Attempters”**

**Authors:** Ani Zerekidze1, Meng Li1, Lydia Bahlmann1, Martin Walter1,2,3, Daniel Güllmar4, Fabricio Pereira5, Fabrice Jollant6,7, Gerd Wagner1,2*

*1 Department of Psychiatry and Psychotherapy, Jena University Hospital, Jena, Germany.*

*2 Center for Intervention and Research on adaptive and maladaptive brain Circuits underlying mental health (C-I-R-C), Halle-Jena-Magdeburg.*

*3 German Center for Mental Health (DZPG), partner site Halle-Jena-Magdeburg.*

*4 Medical Physics Group, Institute of Diagnostic and Interventional Radiology, Jena University Hospital, Jena, Germany*

*5 Department of Clinical Research and Innovation (DRCI), CHU Nîmes, Nîmes, France & Mathématiques, Informatique, Physique et Application ; Département Sciences et Arts; Université de Nîmes, Nîmes, France*

*6 Faculty of medicine, University Paris-Saclay, Le Kremlin-Bicetre, France & Paul Brousse hospital, APHP, Villejuif, France*

*7 Department of psychiatry, McGill Group for Suicide Studies, McGill University, Montreal, Canada*

*AZ and ML equally contributed to this work.*

** Corresponding Author: Gerd Wagner, Department of Psychiatry and Psychotherapy, Jena University Hospital, Philosophenweg 3, 07743 Jena, Germany; wagner.gerd@uni-jena.de*

**Supplementary information**

**Neuropsychological tasks**

*Iowa Gambling Task (IGT)*

The computerized version of the IGT (1, 2) was used. Participants were instructed to choose cards from four decks with the objective of maximizing their total monetary winnings. Each card selection resulted in either a monetary gain or loss, with a total of 100 decisions made throughout the task. Two decks (A and B) provided higher gains but also led to even greater losses, making them disadvantageous in the long run. In contrast, the other two decks (C and D) yielded smaller gains but also even fewer losses, resulting in a net gain. Participants were not told the differences between the decks. The choices were categorized as either advantageous (decks C and D) or disadvantageous (decks A and B). The net score was determined by subtracting the number of disadvantageous choices from the number of advantageous ones. In addition, five intermediate scores were calculated based on blocks of 20 trials, reflecting the learning rate in their choice patterns throughout IGT (1, 3, 4).

*Go/No-Go task*

To assess response inhibition, we adopted the computerized Go/No-Go task (5), in which participants were asked to respond to a specific target letter (e.g., "P") with pressing a key and inhibit responses to a non-target letter (e.g., "R"). The task was divided into two parts. In the first part of the task, participants had to respond to "P" (Go condition, 80% of trials) and to inhibit responses to "R" (No-Go condition, 20% of trials). In the second part, participants had to respond inversely to "R" (now the Go condition) and to suppress responses to "P" (No-Go condition). In total 320 trials were presented, each condition consisting of 160 trials. Four parameters were calculated: correct responses to the target (Go) letter, missed responses to the Go letter (omission error), response to the non-target (No-Go) letter (commission error) and correct non-response to the No-Go letter. Commission errors and reaction times are considered as indicators of motor impulsivity (6).

**References:**

1. Jollant F, Bellivier F, Leboyer M, Astruc B, Torres S, Verdier R, et al. Impaired decision making in suicide attempters. Am J Psychiatry. 2005;162(2):304-10.

2. Bechara A, Damasio H, Damasio AR, Lee GP. Different contributions of the human amygdala and ventromedial prefrontal cortex to decision-making. Journal of neuroscience. 1999;19(13):5473-81.

3. Gorlyn M, Keilp JG, Oquendo MA, Burke AK, John Mann J. Iowa gambling task performance in currently depressed suicide attempters. Psychiatry Res. 2013;207(3):150-7.

4. Bridge JA, McBee-Strayer SM, Cannon EA, Sheftall AH, Reynolds B, Campo JV, et al. Impaired decision making in adolescent suicide attempters. Journal of the American Academy of Child & Adolescent Psychiatry. 2012;51(4):394-403.

5. Mueller S. The PEBL Go/No-Go test. Software recuperado de: <http://pebl> sf net/battery html. 2011.

6. Bezdjian S, Baker LA, Lozano DI, Raine A. Assessing inattention and impulsivity in children during the Go/NoGo task. Br J Dev Psychol. 2009;27(Pt 2):365-83.
